1 Article

# 2 Moderately Inducing Autophagy Reduces Tertiary 3 Brain Injury After Perinatal Hypoxia-Ischemia

4 Brian H. Kim<sup>1</sup>, Maciej Jeziorek<sup>2</sup>, Hur Dolunay Kanal<sup>1</sup>, Radek Dobrowolski<sup>2,3#</sup> and Steven W.  
5 Levison<sup>1\*</sup>

6 <sup>1</sup> Department of Pharmacology, Physiology and Neuroscience  
7 Rutgers-New Jersey Medical School, Newark, NJ, USA

8 <sup>2</sup> Federated Department of Biological Sciences

9 Rutgers University/New Jersey Institute of Technology, Newark, NJ, USA

10 <sup>3</sup> Glenn Biggs Institute for Alzheimer's & Neurodegenerative Diseases, University of Texas Health Sciences  
11 Center, San Antonio, TX, USA

12 # Co-senior author

13 \* Correspondence: Steven W. Levison, PhD, Laboratory for Regenerative Neurobiology, Department of  
14 Pharmacology, Physiology & Neuroscience, Rutgers University-New Jersey Medical School, 205 South  
15 Orange Avenue, Newark, NJ 07103; levisosw@rutgers.edu

16

17 Received: date

18 **Abstract:** Recent studies of cerebral hypoxia-ischemia (HI) have highlighted slowly progressive  
19 neurodegeneration whose mechanisms remain elusive, but if blocked, could considerably improve  
20 long-term neurological function. We previously established that the cytokine transforming growth  
21 factor (TGF) $\beta$ 1 is highly elevated following HI and that delivering an antagonist for TGF $\beta$  receptor  
22 activin-like kinase 5 (ALK5) – SB505124 – 3 days after injury in a rat model of moderate pre-term HI  
23 significantly preserved the structural integrity of the thalamus and hippocampus as well as  
24 neurological functions associated with those brain structures. To elucidate the mechanism whereby  
25 ALK5 inhibition reduces cell death, we assessed levels of autophagy markers in neurons and found  
26 that SB505124 increased numbers of autophagosomes and levels of lipidated LC3 (light chain 3), a  
27 key protein known to mediate autophagy. However, those studies did not determine whether 1) SB  
28 was acting directly on the CNS and 2) whether directly inducing autophagy could decrease cell  
29 death and improve outcome. Here we show that administering an ALK5 antagonist 3 days after  
30 HI reduced actively apoptotic cells by ~90% when assessed one week after injury. Ex vivo studies  
31 using the lysosomal inhibitor chloroquine confirmed that SB505124 enhanced autophagy flux in the  
32 injured hemisphere, with a significant accumulation of the autophagic proteins LC3 and p62 in  
33 SB505124 + chloroquine treated brain slices. We independently activated autophagy using the  
34 stimulatory peptide Tat-Beclin1 to determine if enhanced autophagy is directly responsible for  
35 improved outcomes. Administering Tat-Beclin1 starting 3 days after injury preserved the structural  
36 integrity of the hippocampus and thalamus with improved sensorimotor function. These data  
37 support the conclusion that intervening at this phase of injury represents a window of opportunity  
38 where stimulating autophagy is beneficial.

39 **Keywords:** encephalopathy, autophagy, cell death, premature birth, neuroprotection

40

## 41 1. Introduction

42 Neonatal encephalopathy is a common cause of neurological morbidity in infants, occurring in  
43 3 per 1000 live births annually. While the etiology of encephalopathy can be non-specific and  
44 heterogeneous, hypoxia-ischemia (HI) remains the predominant cause of neurologic impairment in

45 50% of all cases [1]. As the name implies, HI injury arises from inadequate oxygenation/perfusion to  
46 the fetus during birth (e.g., asphyxiation) [2]. Clinicians currently use a combination of maternal  
47 medical history and physical exam findings to diagnose HI encephalopathy, as more specific and  
48 reliable markers of injury have not been identified [3]. While neuroimaging can evaluate the pattern  
49 and severity of injury, it may not be included in the initial clinical assessment. Such shortcomings  
50 increase the time in which an acute HI event is accurately determined, compromising successful  
51 interventions.

52 Clinical and experimental data continue to bolster the view-point that encephalopathy due to  
53 HI is an “evolving process” in which the initial injurious event triggers a cascade of death effectors  
54 in the weeks that follow [4]. Diffusion-weighted brain imaging studies of HI neonates taken across  
55 3-4 days capture an expansion of the initial superficial lesion of the neocortex to involve deeper  
56 regions of the brain [5]. Within the first 6 hours of injury, cells within the core of the infarction  
57 undergo necrosis, having received the brunt of ischemic injury [6]. After this acute stage of primary  
58 cell death, surviving cells within the penumbra face stored energy depletion, mitochondrial  
59 dysfunction, ion transport failure, and accumulation of free radicals and excitatory amino acids [7,  
60 8]. Cellular death is predominantly apoptotic during this phase, with caspase-3 and AIF dependent  
61 pathways steadily increasing up to 48 hrs after injury [9]. We and others have identified this stage  
62 as a period of secondary energy failure and neurodegeneration [10-12].

63 Beyond 72 hours after injury, the damaged brain can continue to deteriorate as inflammation  
64 persists [10, 13]. In this tertiary stage, persistent maladaptive glial activation can sustain a pro-  
65 inflammatory environment aggravating neuronal cell death. In moderate HI injury, apoptotic  
66 deaths steadily increase for up to 2 weeks post-injury eventually surpassing the rate of death seen  
67 at 24 hours [9]. Given this time window, these cells represent an important target for therapeutic  
68 interventions.

69 We previously showed that inhibiting the TGF $\beta$  type I receptor ALK5 using the small molecule  
70 antagonist SB505124 significantly improved neurological outcome, even when administered as late  
71 as 3 days after injury in a rat model of late pre-term HI [14]. Hemispheric volume measurements  
72 indicated that two brain structures particularly susceptible to HI injury (i.e., hippocampus and  
73 thalamus) were preserved up to 3 weeks past the initial insult [14, 15]. This led to preserved  
74 sensorimotor function and to improved learning and memory, indicating that ALK5 inhibition can  
75 confer long-term protection and maintain neurological integrity [15]. Thus, the tertiary stage of HI  
76 injury represents a promising window for therapeutic intervention that needs to be evaluated in  
77 clinical trials, specifically via TGF $\beta$ -signaling inhibition.

78 Delayed ALK5 inhibition preserved several important brain structures following HI  
79 presumably by reducing tertiary cell death, but additional studies remained to elucidate the  
80 mechanism(s) through which those structures are preserved. Here, we subjected rats on P6 to the  
81 Vannucci HI model of brain injury to study late preterm injury. We evaluated the level of cell death  
82 occurring after HI injury and investigated the effects of ALK5 inhibition on the level of autophagy,  
83 a neuroprotective process responsible for clearing cellular debris in the lysosome. Correspondingly,  
84 we evaluated the use of the autophagy inducing peptide, Tat-Beclin1, to determine whether directly  
85 enhancing autophagic flux would reduce tertiary cell death after HI injury.

## 86 **2. Materials and Methods**

### 87 *2.1. Rodents*

88 All experiments were performed in accordance with research guidelines set forth by Rutgers  
89 New Jersey Medical School IACUC and were in accordance with the National Institute of Health  
90 Guide for the Care and Use of Laboratory Animals (NIH Publications No. 80-23) revised in 1996 and  
91 the ARRIVE guidelines. Time pregnant Wistar rats at embryonic day 18 of gestation were purchased

92 from Charles River Laboratories (Wilmington, MA). Following delivery, litter sizes were adjusted to  
93 12 pups per litter, and efforts were made to ensure the number of each sex and pup weights were  
94 equal and consistent. Animals were group housed and kept on a 12-hour light:dark cycle with ad  
95 libitum access to food and autoclaved water. Rat pups remained undisturbed with the dam until the  
96 day of HI injury. Following injury, the pups were returned to their respective dam.

### 97 2.2. Neonatal hypoxic-ischemic brain injury

98 Cerebral HI in 6-day-old rat pups (P6, day of birth = P0; mean body mass = 15g) as a model of  
99 late pre-term injury was performed as previously described [14, 16]. Briefly, rats were anesthetized  
100 with isoflurane (3-4% induction, 1-2% maintenance) prior to right common carotid artery  
101 cauterization. A special effort was made to carefully isolate the carotid without damaging other  
102 structures contained within the carotid sheath (i.e., internal jugular vein and vagus nerve). The neck  
103 incision was sutured with 4-0 surgical silk. Following a one-hour recovery period, rats were exposed  
104 to 75 min of hypoxia in humidified 8% oxygen/nitrogen balance. Sham rats were anesthetized and  
105 underwent isolation of the right common carotid without cauterization and then were exposed to  
106 hypoxia. Rats in each litter were randomly assigned to experimental groups after HI injury. Sample  
107 sizes per experiment were chosen to achieve sufficient statistical power with minimal numbers of  
108 animals based on pilot studies.

### 109 2.3. SB505124 drug delivery

110 Three days following HI injury, rats were anesthetized (isoflurane, 3-4% induction, 1-2%  
111 maintenance) and an incision was made in the subcapsular region. Osmotic pumps (Alzet 1007D;  
112 Durect, Cupertino, CA) were loaded with either vehicle (sodium citrate buffer with 30% DMSO v/v)  
113 or 30mM of the ALK5 pharmacological inhibitor, 2-(5-Benzo [1,3] dioxol-5-yl-2-tert-butyl-  
114 3Himidazol-4-yl)-6-methylpyridine hydrochloride hydrate (SB505124) (Sigma-Aldrich; St. Louis,  
115 MO) and implanted subdermally. The incision was then sutured with 4-0 surgical silk and animals  
116 were surveyed twice per day for signs of infection and/or distress. The 1007D model osmotic pump,  
117 which can continuously deliver solutions for 7 days, was left implanted until euthanization. Animals  
118 subjected to analyses were treated with SB505124 for 4 days, following the same dosing schedule as  
119 in our previous studies [14].

### 120 2.4. Tat-Beclin1 administration

121 Three days following HI injury, rats were injected i.p. with 50 uL Tat-Beclin1 (EMD Millipore;  
122 Billerica, MA) at 15 mg/kg or vehicle (PBS). To assess brain penetrance, brain samples were collected  
123 48 h after injection and processed for Western blot analysis and immunostaining of autophagic  
124 markers LC3 and p62. For sensorimotor function assessment at P20, rats were injected with Tat-  
125 Beclin1 or vehicle once on day 3 and again on day 5 after injury.

### 126 2.5. Organotypic slice culture

127 Three days following HI, rats were deeply anesthetized, rapidly decapitated and the brains  
128 removed. Brains were placed onto a steel brain matrix (Stoelting Co.; Wood Dale, IL) immersed in  
129 cold DMEM media, and 1000  $\mu$ m-thick coronal slices were cut using a microtome blade spanning the  
130 region that was within the territory affected by injury (approx. Bregma 1.0 to -3.0). Cut slices were  
131 transferred to a 6-well tissue culture cluster with sterile DMEM supplemented with 20% horse serum  
132 (v/v). Once plated the media was exchanged with fresh DMEM w/ 20% serum (control) or DMEM w/  
133 20% serum + 15  $\mu$ M SB505124 and the slices were placed into an incubator at 37°C, 5% CO<sub>2</sub>. Particular  
134 effort was made to ensure that the slices were never fully submerged in the media to ensure proper  
135 gas exchange during incubation. After 1 hour the media were exchanged with fresh DMEM w/ 20%  
136 serum or DMEM w/ 20% serum + 200  $\mu$ M Chloroquine for lysosomal inhibition. After an additional  
137 hour the slices were washed with cold DMEM, and the hemisphere ipsilateral to HI injury was  
138 collected in cold lysis buffer for Western blot.

139 2.6. *Sensorimotor tests*

140 Two weeks following HI injury, rats were subjected to a battery of sensorimotor function tests.  
141 Tests were conducted by an investigator blinded to the experimental groups.

142 Modified Neurological Severity Test (mNSS)

143 The mNSS is comprised of a series of 11 different tests that are evaluated and aggregated into a  
144 modified neurological severity score as described in detail previously [14].

145 Beam Walking Tasks

146 Rats were tested on horizontal beam and inclined beam walking tasks. For the horizontal beam  
147 the rats were placed at the end of a 2.5 cm wide, 80 cm long wooden beam that was suspended 42 cm  
148 above the ground. A dark box with bedding was at the other end of the beam and served as a target  
149 for the rats to reach. For the inclined beam-walking test, an elevated (80 cm in length and 2 cm in  
150 width) wooden beam was placed at a 30° angle. The number of foot slips (either hind legs or front  
151 legs) and the time to traverse each beam was recorded and assessed. Decreased performance on an  
152 inclined beam has been linked with decreased subcortical white matter integrity after injury. Failure  
153 to climb the beam in less than 15 seconds was considered a fail.

154 Hang test

155 The rats were allowed to grasp a 1 cm diameter bar with their forelimbs and the time that the rat  
156 held onto the bar was measured. Each rat was tested over 3 non-consecutive trials.

157 2.7. *Western blot analyses*

158 Microdissected brain tissue from the injured (ipsilateral) and uninjured (contralateral)  
159 hemispheres was collected. The tissue was homogenized and then sonicated in lysis buffer. Thirty  
160 micrograms of denatured protein were loaded onto a 4-12% Bis-Tris gel (Invitrogen, Carlsbad, CA)  
161 and 5 µL of Amersham ECL Rainbow Marker was loaded as a molecular weight standard (GE Life  
162 Sciences, Pittsburgh, PA). Proteins were transferred onto nitrocellulose and incubated with primary  
163 antibody: LC3 (rabbit polyclonal, Cell Signaling, cat # 12741S, 1:1000), SQSTM1/p62 (guinea pig  
164 polyclonal, American Research Products, Cat # 03-GP62-C, 1:1000), Actin (mouse monoclonal, Sigma-  
165 Aldrich, cat#A5441, 1:000). Membranes probed for LC3 and Actin were washed with 0.01% TBS-  
166 Triton X, incubated in HRP-conjugated secondary antibodies (donkey anti mouse HRP, Jackson  
167 ImmunoResearch, Cat. #715-035-150 or Goat anti rabbit HRP: Cell Signaling Technology, Cat. #  
168 7074S). Membranes probed for p62 were washed with 0.01% TBS-Triton X and incubated in  
169 biotinylated anti-guinea pig (goat polyclonal, EMD Millipore, cat #AP193B, 1:2500) secondary  
170 antibody, and later in Streptavidin-HRP (Thermo-Fisher, Cat # 21126, 1:2500). Membranes were  
171 washed, and bands visualized using Western Lightning chemiluminescence reagent (PerkinElmer,  
172 Wellesley, MA). Imaging was performed using a BioRad ChemiDoc Imaging System combined with  
173 Image Lab software (Hercules, CA).

174 2.8. *Brain histology and immunofluorescence*

175 In Situ End Labeling (ISEL)

176 One week after HI injury, rats were deeply anesthetized with sodium pentobarbital before  
177 intracardiac perfusion with 4% paraformaldehyde (PFA) in PBS. Brains were post-fixed overnight in  
178 4% PFA/PBS, cryoprotected with 30% sucrose overnight and embedded in Tissue-Tek OCT matrix  
179 (Sakura Finetek, Torrance, CA). Serial coronal sections of 25-30 µm thickness were taken through the  
180 hippocampal and thalamic regions using the cryostat at -14°C and mounted on slides. Sections were  
181 dehydrated and rehydrated in ethanol and water and incubated with 10 µM dNTP mix containing  
182 Digoxigenin-dUTP and 20 U/mL Klenow Fragment (Roche; Basel, Switzerland) at room temperature  
183 for 2 h. DIG-labeled nucleotides were detected using Anti-Digoxigenin-Fluorescein (sheep  
184 polyclonal, Roche, 1:75) incubated overnight at 4°C. Images were collected by an investigator blinded  
185 to each group using an Olympus Provis fluorescent microscope. Images were captured using a Q-  
186 imaging mono 12-bit camera interfaced with iVision 4 scientific imaging software (Scanalytics,  
187 Rockville, MD). Signal intensities were quantified using Fiji with plugins.

188

189 Autophagy Immunofluorescence

190 Frozen coronal sections of 25-30  $\mu\text{m}$  thickness were taken through the hippocampal and  
191 thalamic regions using a cryostat at  $-14^{\circ}\text{C}$  and mounted on slides. Sections were then incubated with  
192 primary antibodies in 1% goat serum/0.05% Triton X-100/PBS at  $4^{\circ}\text{C}$  overnight. Primary antibodies  
193 included: 1) guinea pig anti-p62 (American Research Products, 1:300); 2) rabbit anti-LC3 (Cell  
194 Signaling, 1:200); and 3) mouse anti-NeuN (mouse monoclonal, Millipore, cat # MAB377, 1:100); and  
195 mouse anti-S100 $\beta$  (Sigma S2532, 1:500). Sections were washed with 0.05% Triton X-100/PBS three  
196 times for 30 min and incubated with secondary antibodies for 2 h at room temperature. Secondary  
197 antibodies included: donkey anti-guinea pig Cy5; donkey anti-rabbit Alexa 488; and donkey anti-  
198 mouse Cy3 (all from Jackson ImmunoResearch, 1:250). Sections were washed with 1% goat  
199 serum/0.05% Triton X-100/PBS three times and mounted in Prolong Gold Antifade Mount with DAPI  
200 (Thermo Scientific, Waltham, MA). Confocal images were collected by an investigator blinded to each  
201 group using a Zeiss spinning-disc microscope and ZEN software. All acquired images used the  
202 same acquisition and laser settings, set initially using Sham (uninjured) samples. Images were  
203 processed such that p62 signals (detected in the far-red region) were converted to red and NeuN  
204 signals (detected in the red region) were converted to blue for signal colocalization studies. Signal  
205 intensities were quantified using Fiji with plugins [17].

206

207 LC3-p62 Co-localization analyses

208 Three images were captured from each brain (n=3 animals per group) for a total of 45-60 cells  
209 per determination in each brain region (neocortex, white matter, hippocampus and thalamus). The  
210 images were coded to blind the investigator to group identities and Auto-threshold (provided in Fiji  
211 plugin bundle) was performed to eliminate potential bias during elimination of background signal.  
212 Manders' co-localization coefficient (MCC) was determined using the JACoP plugin for Fiji. The M1  
213 value reported represents the fractional overlap of p62 signal in compartments containing LC3 signal.  
214 A value of 1 represents complete overlap of both signals; a value of zero represents no overlap. The  
215 benefits of reporting the MCC over Pearson's colocalization coefficient or Manders' overlap  
216 coefficient is reviewed by Dunn et al., 2011 [18].

217

218 Structural analysis

219 Two weeks after HI injury in Tat-Beclin1 treated rats, whole brains were extracted and  
220 dehydrated in 70% ethanol and then embedded in paraffin. Brain sections were cresyl violet stained  
221 and imaged using an Olympus SZXY brightfield microscope with CCD camera and acquired on  
222 PictureFrame software (Optronics; Goleta, GA). The regions of ipsilateral/contralateral hippocampus  
223 and thalamus were labeled using the polygonal trace tool and area was determined via ImageJ. Six  
224 coronal sections were analyzed per animal, and the average percentage of each structure was  
225 compared to its corresponding contralateral side.

226 *2.9. Data analyses and statistics*

227 Raw data from image analyses and behavioral tests were imported into Prism (GraphPad  
228 Software; La Jolla, CA) for statistical analyses using ANOVA followed by Tukey's post hoc  
229 intergroup comparison. Graphs were produced in Prism and error bars denote standard error of  
230 means (SEMs). Significance among colocalization coefficients in immunofluorescence imaging was  
231 determined using ANOVA followed by Tukey's post hoc intergroup comparison.

232

233 **3. Results**

234 *3.1. Delayed SB505124 reduces the number of apoptotic cells in the neocortex after HI injury*

235 To determine whether the volume preservation seen with delayed SB505124 treatment was due  
236 to a decrease in the number of actively apoptotic cells, we collected brain tissue 4 days after  
237 SB505124 administration (equal to one week after injury) and stained sections using ISEL. This  
238 method of nicked DNA strand labeling detects cells in the early stages of apoptotic cell death and  
239 yields fewer false positives than TUNEL [19]. Based on the established stages of neurodegeneration,  
240 we suspect that the majority of ISEL+ cells at this phase – one week after injury – are apoptotic  
241 rather than necrotic or necroapoptotic. The neocortex was chosen for analysis based on our  
242 previous study which indicated that the neocortex showed the greatest change in autophagic  
243 protein LC3 and had extensive LC3 and p62 co-localization [15]. Compared to vehicle treatment,  
244 SB505124 treatment yielded a 90.64% reduction (\*\* $p < 0.01$ ) in the number of ISEL+ cells in the  
245 neocortex, indicating a significant reduction in the number of apoptotic cells (Fig. 1).

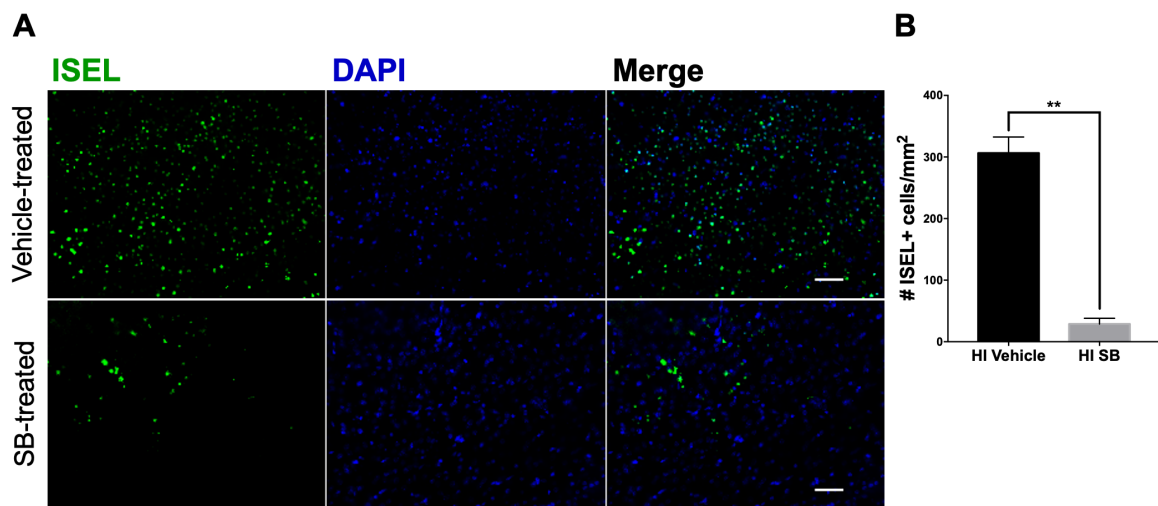

246

247 **Figure 1. SB505124 diminishes the number of actively apoptotic cells in the neocortex after HI**  
248 **injury.** One week after HI injury at P6, samples of the injured forebrain were analyzed for actively  
249 dying cells using in situ end labeling (ISEL). SB505124 or vehicle was administered via osmotic pump  
250 beginning at 3 days after injury and maintained for 4 days prior to intracardiac perfusion. Thirty  $\mu\text{m}$   
251 sections were processed for ISEL. Cells with green nuclei indicate nicked DNA strands. (a) Panels  
252 depict representative neocortical cells in the ischemic penumbra of injury in vehicle-treated and  
253 SB505124-treated animals. Scale bars in merged image represent 20  $\mu\text{m}$ . (b) Quantitative analysis of  
254 the number of ISEL+ cells of the neocortex per  $\text{mm}^2$ .  $n=4$  per group. Data are presented as means  $\pm$   
255 SEM \*\* $p < 0.001$  by T-test.

### 256 3.2. Delayed SB505124 induces autophagic flux after HI Injury

257 Our prior data provided evidence that ALK5 inhibition altered autophagy, but the evidence  
258 was insufficient to conclude that it increased autophagic flux [15]. For example, LC3-II levels and  
259 LC3/p62 overlap can also increase when autophagosome turnover is disrupted as occurs with  
260 defects in autophagosome trafficking to lysosomes and defective membrane fusion [20, 21].  
261 Therefore, to measure autophagic flux, we prepared brain slices from the HI injured brain three  
262 days after HI injury and then inhibited lysosomal function *ex vivo* using chloroquine. Levels of  
263 LC3 and p62 protein were then quantified by Western blot. To assess the effects of SB505124 on  
264 autophagic flux, slices were treated with the antagonist alone or the antagonist in combination with  
265 chloroquine.

266 LC3-I levels significantly declined with HI injury without any treatments added (labeled  
267 Media Only, M.O., \* $p < 0.05$ ); this difference disappeared in chloroquine and SB treated groups (Fig.  
268 2A,B). Incubation with SB505124 reduced LC3-I levels in Naïve (\*\* $p < 0.001$ ), Sham (\*\* $p < 0.001$ ), and  
269 HI groups (trending, n.s.) compared to no treatment. LC3-I significantly increased in HI brain slices

270 treated with SB505124 + Chloroquine compared to either Chloroquine (### $p < 0.0001$ ) or SB505124  
271 alone (### $p < 0.0001$ ). The increase in LC3-I obtained with the combined treatment was greater than  
272 Naïve or Sham injured controls, but these differences were not statistically significant. Likewise,  
273 levels of the membrane-bounded LC3-II that represents autophagosomal number, declined with HI  
274 injury without any treatments (Fig. 2C). Interestingly, LC3-II levels tended to increase compared to  
275 Naïve or Sham injured controls with SB505124 treatment and with the combination treatment.  
276 However, the differences in each instance were not statistically significant. The ratio of LC3-II to  
277 LC3-I largely did not change across groups and treatments, however, there was a trend for an  
278 increase in ratio in HI injury with SB505124 treatment (Fig. 2D). Levels of p62 decreased with HI  
279 injury without treatment and with chloroquine or SB505124 treatment. With combined treatment  
280 with SB505124 and chloroquine, p62 levels rose significantly in the HI brain slices compared to  
281 Naïve controls (\*\* $p < 0.001$ , Fig. 2E). This increase of p62 levels was significantly different compared  
282 to HI injury with chloroquine (## $p < 0.001$ ) or SB505124 treatment alone ( $p < 0.001$ ) and provides  
283 strong evidence that SB505124 treatment increases autophagic flux.

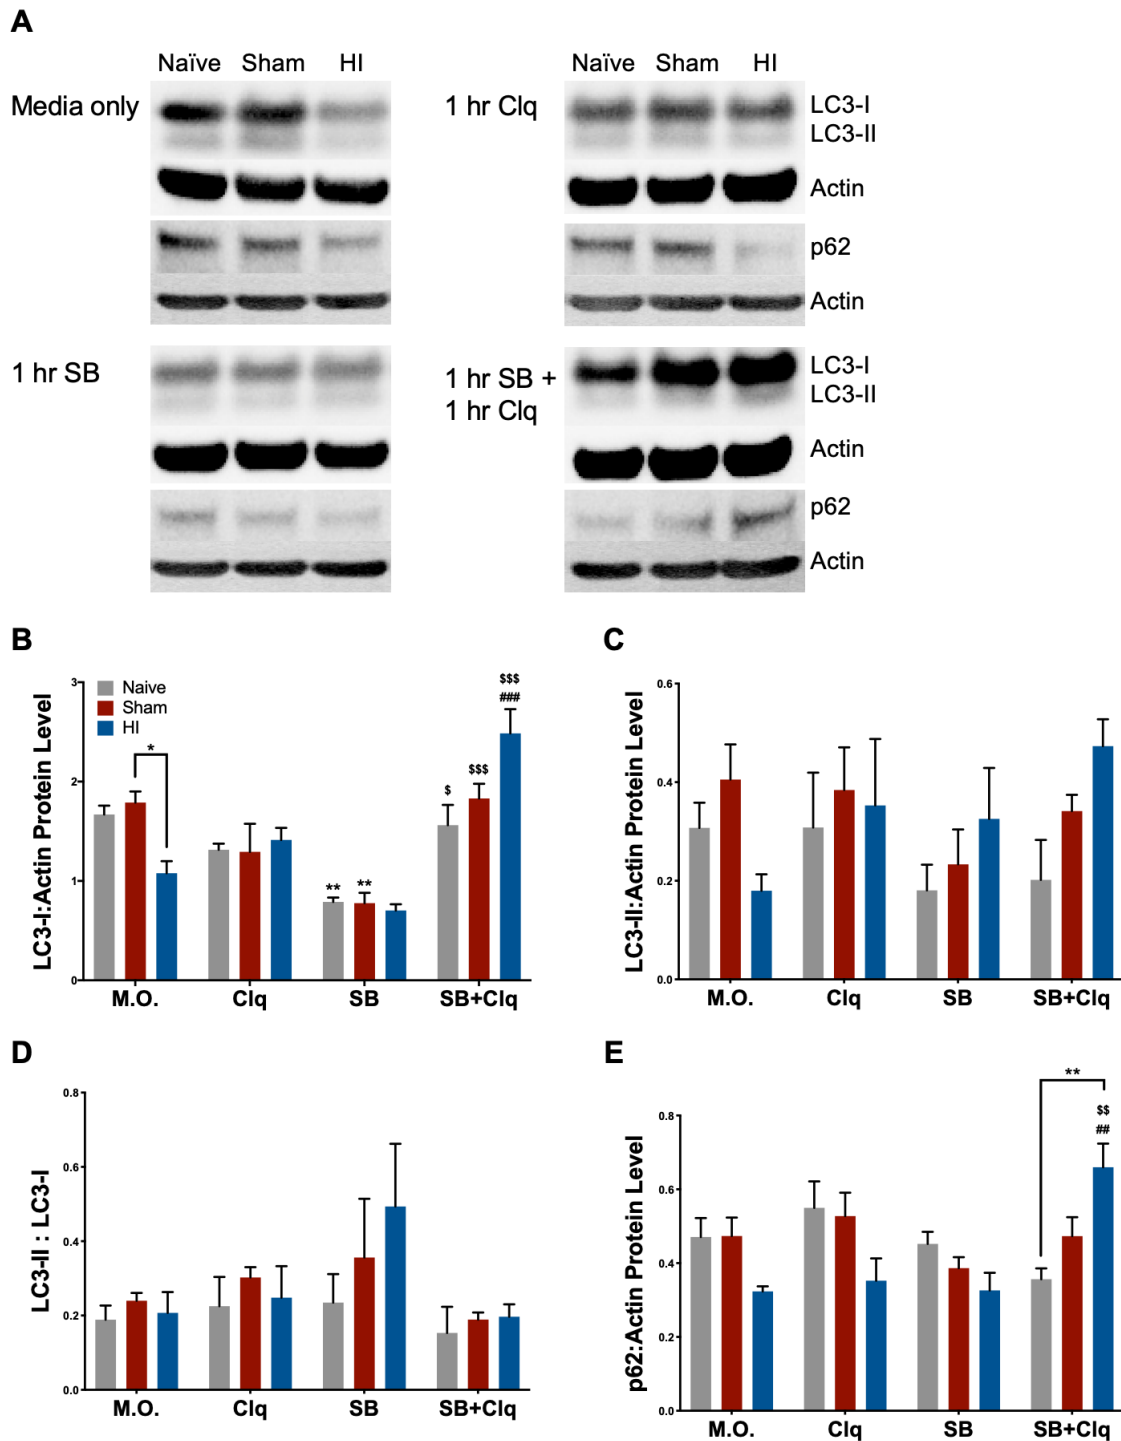

284

285

286

287

288

289

290

291

292

293

294

**Figure 2. SB505124 induces autophagic flux in the injured hemisphere after HI Injury.** Three days after HI, 1000  $\mu\text{m}$  thick coronal slices were incubated with SB505124 (SB) or SB505124 + Chloroquine (SB+Clq) in DMEM w/ 20% horse serum (Media Only control, M.O.) for 2 h total in 37°C, 5% CO<sub>2</sub> to assess the effect of SB505124 on active autophagy. The injured hemisphere was collected and protein extracted for Western blot. (a) Representative blot for LC3, p62, and  $\beta$ -Actin (loading control) from the injured hemisphere. (b) Quantitative analysis of band optical densities for LC3-I, (c) LC3-II, (d) ratio of LC3-II:LC3-I band densities, and (e) band optical densities for p62. n=4-5 per group. Data are presented as means  $\pm$  SEM; \*p<0.05, \*\*p<0.001 when denoted by bracket; \*\*p<0.001 for M.O. vs. SB treated slices; ##p<0.001, ###p<0.0001 for Clq treated vs. SB+Clq treated slices; \$p<0.05, \$\$p<0.001, \$\$\$p<0.0001 for SB treated vs. SB+Clq treated slices by ANOVA followed by Tukey's post hoc test.



295 3.3. Independently augmenting autophagy after HI injury improves sensorimotor performance and limits  
296 long-term neurodegeneration

297 After determining that SB505124 administration increased autophagic flux in the brain, we  
298 wanted to determine whether directly stimulating autophagic flux during the same interventional  
299 period used for SB505124 would preserve brain cells and improve functional outcomes. We  
300 administered the autophagy inducing peptide, Tat-Beclin1, i.p. 3 days following HI injury, which is  
301 approximately the same time point at which SB505124 was administered in our previous  
302 experiments [15]. First, we determined whether the systemic delivered peptide could penetrate into  
303 the CNS to alter autophagic protein levels (Fig. 3). A dosage of 15 mg/kg (administered once) was  
304 chosen as a previous study had shown its efficacy in inducing autophagy in rodents [22]. A higher  
305 dosage was decided against to prevent over-stimulation which may drive cell death via autosis [23].  
306 By Western blot of brain homogenates collected 48 h after the Tat-Beclin1 administration, p62 levels  
307 declined more than 2-fold compared to vehicle (Fig. 3A-B, \* $p < 0.05$ ), and the LC3-II:LC3-I ratio was  
308 elevated in both vehicle- and Tat-Beclin1-treated groups (Fig. 3C). Additionally, p62/LC3  
309 immunofluorescence overlap increased in NeuN+ neurons of Tat-Beclin1 treated brains (Fig. S1A-B)  
310 whereas p62/LC3 immunofluorescence overlap did not increase in S-100 $\beta$ + astrocytes (Fig. S1C-D).  
311 These changes were apparent at 48 h after Tat-Beclin1 injection, suggesting that the peptide has  
312 lasting effects on the brain at this dosage in the rat.

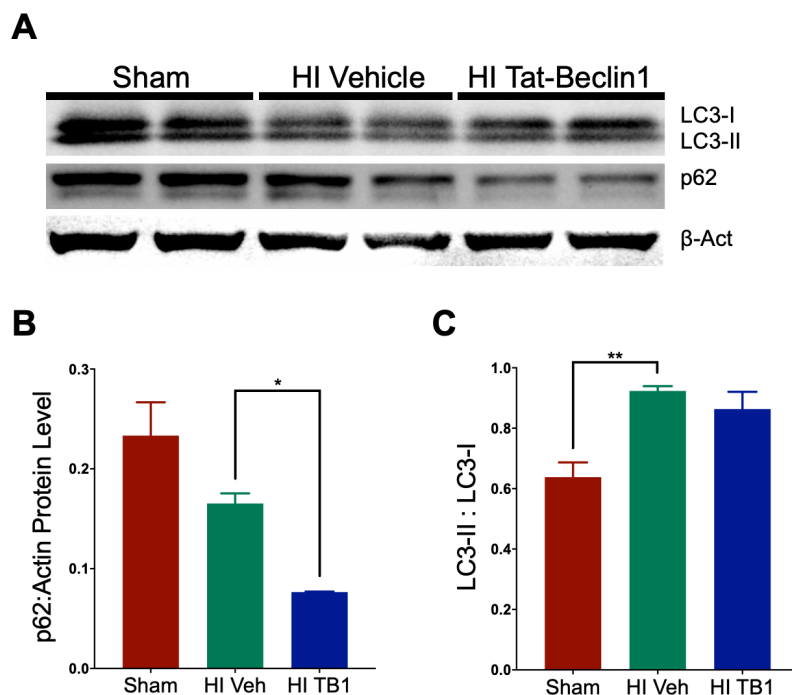

313

314 **Figure 3. Systemic Tat-Beclin1 administration induces autophagy in the brain up to 48 h after**  
315 **injection.** Three days after HI, rat pups were injected i.p. with Tat-Beclin1 (15mg/kg) or vehicle (PBS).  
316 48 h after injection, samples of the injured forebrain were prepared for Western blot. (a)  
317 Representative blot for LC3, p62, and  $\beta$ -Actin (loading control) from the injured hemisphere. (b)  
318 Quantitative analysis of band optical densities for p62 and (c) ratio of LC3-II:LC3-I band densities  
319 (n=3/group). Data are presented as means  $\pm$  SEM; \* $p < 0.05$ , \*\* $p < 0.001$ .

320 Given that a single dose of Tat-Beclin1 induced autophagy 48 h after injection, we administered a  
321 second injection 72 h after the first for longer timepoint assessments. This timeline was chosen to  
322 approximate the drug bioavailability of one-week SB505124 administration (Fig. 4A). Two weeks  
323 after injury and Tat-Beclin1 administration, rats were subjected to behavioral analyses to assess  
324 sensorimotor deficits. The body weight of each rat was tracked during this two-week period.

325 Vehicle-treated HI injured rodents weighed significantly less than their Sham control counterparts  
326 (\* $p < 0.05$ , Fig. 4B) while there was no difference in weights in animals treated with Tat-Beclin1  
327 versus sham controls. Measurement of the gross hemispheric volume, that was then rendered as a  
328 hemispheric ratio (injured ipsilateral area to contralateral area), revealed a significant loss of brain  
329 tissue in vehicle-treated rats (\*\* $p < 0.0001$  vs. Sham, \*\* $p < 0.001$  vs. HI TB1), while there was no  
330 significant difference in the ratio in either the Tat-Beclin1 treated or Sham-injured animals (Fig. 4C).

331 In measures of sensorimotor performance, vehicle-treated rats performed the worst, with the  
332 greatest number of foot slips per run on the horizontal 2.5 cm beam ( $1.48 \pm 0.21$  slips) and incline  
333 beam tests ( $1.11 \pm 0.12$  slips) (Fig. 4D-E). Tat-Beclin1 treated rats had significantly fewer foot slips  
334 than vehicle-treated rats on the horizontal beam ( $0.81 \pm 0.22$  slips, \* $p < 0.05$ , Fig. 4D), and did not  
335 perform any differently compared to Sham controls. Rats were also assessed on the ability to hold  
336 onto a horizontal bar using their forelimbs: Sham animals held on the longest on average ( $14.04 \pm$   
337  $3.48$  sec), followed by Tat-Beclin1 treated animals ( $12.43 \pm 2.42$  sec) (Fig. 4E). There was no statistical  
338 difference between the Tat-Beclin1 group and the Sham control. Vehicle-treated rats performed the  
339 worst on this assessment, holding onto the bar for significantly less time than Sham rats ( $4.06 \pm 1.07$   
340 sec, \* $p < 0.05$ ). Sensorimotor metrics were tabulated into a modified neurological severity score  
341 (mNSS) system, in which a higher score denotes poorer performance and consequently greater  
342 impairment. Vehicle-treated animals scored significantly higher ( $2.22 \pm 0.32$ ) compared to Sham  
343 animals ( $0.56 \pm 0.18$ , \*\* $p < 0.001$ ) while Tat-Beclin1 treated animals exhibited some neurological  
344 impairment, but they were less impaired than the Vehicle-treated rats ( $1.67 \pm 0.17$ ). Once again, Tat-  
345 Beclin1 treated animals showed no statistical difference from the Sham controls (Fig. 4G).

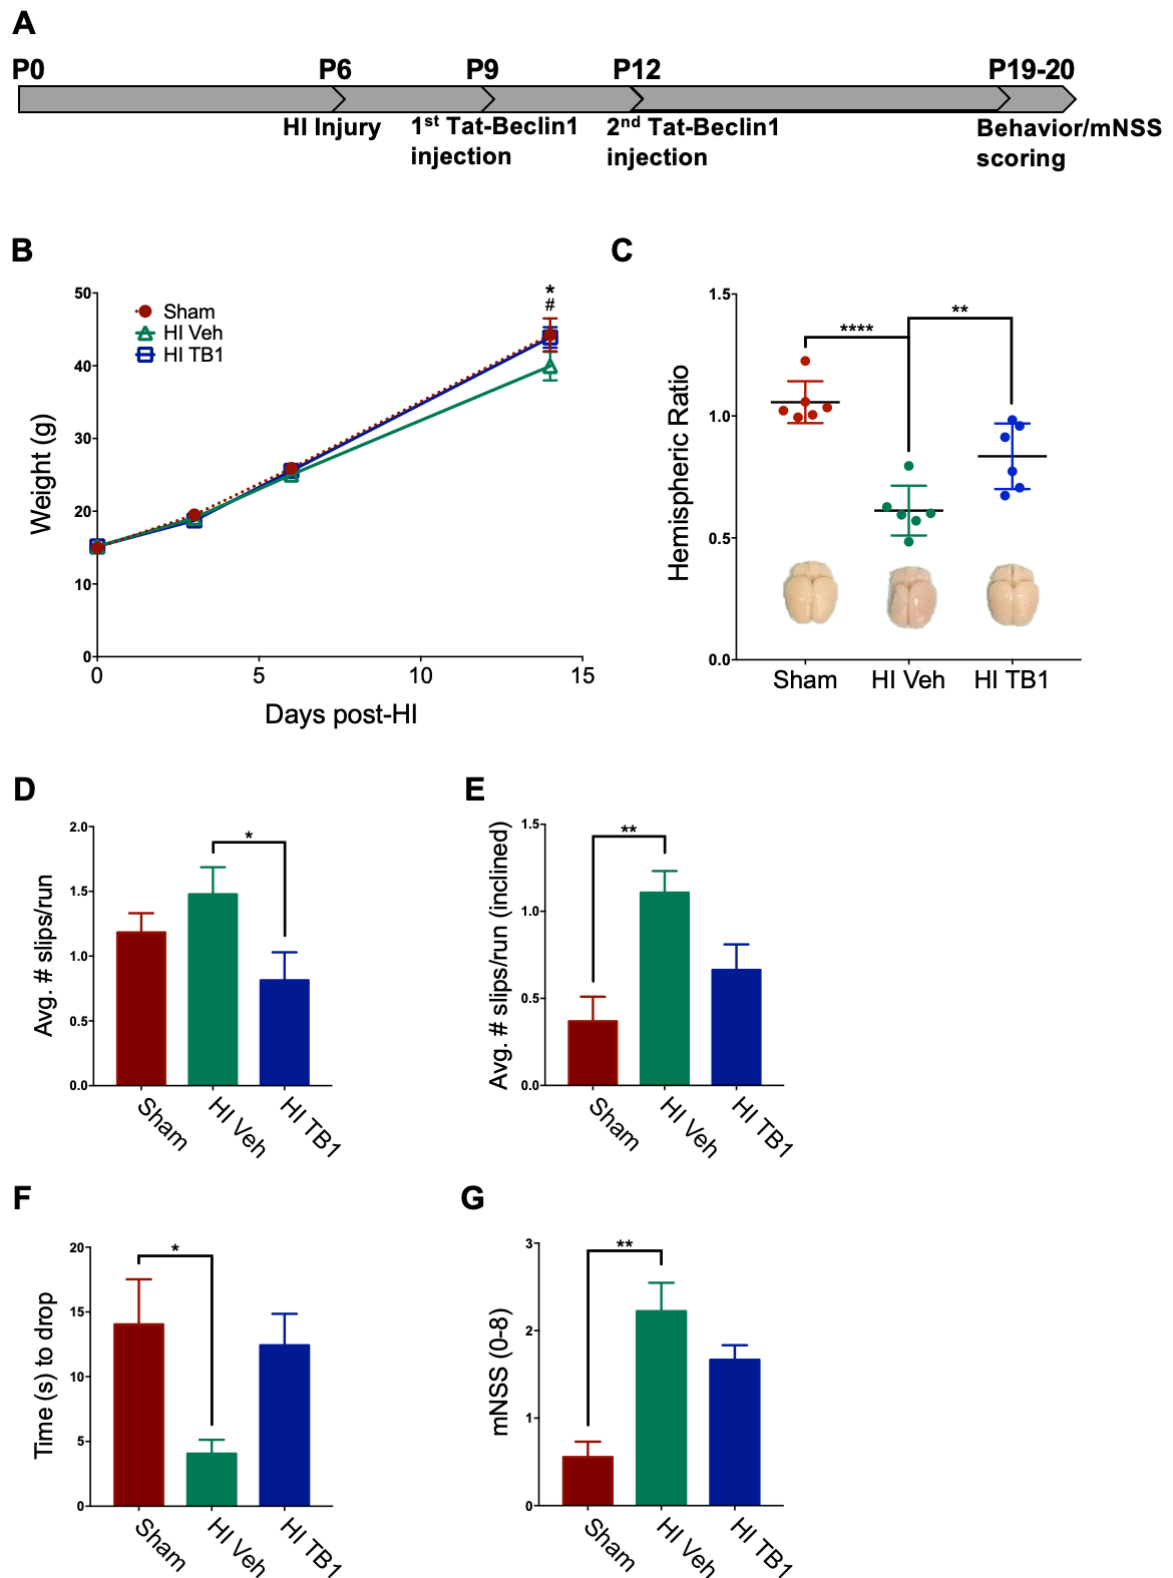

346

347

348

349

350

351

352

353

**Figure 4. Systemically administered Tat-Beclin1 improves sensorimotor outcomes after HI injury.**

Two weeks after HI injury at P6, behavioral tests were performed to assess sensorimotor function. (a) Outline of the experimental paradigm of HI injury and behavioral testing. Three days after injury on P6, rat pups were injected once with Tat-Beclin1 (15 mg/kg), and again 72 h after the first injection. Sensorimotor testing began 13 days following HI injury. Rats were given a pre-training session 24 h before the start of testing. (b) Body mass of Sham injured, HI injured with vehicle and Tat-Beclin1 (TB1) administered rat pups tracked for two weeks after HI injury on P6. (c) Hemispheric ratio (IL:CL)

354 with representative images of brains following extraction. (d) Average slips per run on 2.5 cm wide  
355 balance beam. (e) Average slips per run on inclined 2.5 cm wide balance beam, (f) Time to drop (s)  
356 for hanging bar, (g) mNSS score. n=9 per group. Data are presented as means  $\pm$  SEM; \* $p$ <0.05,  
357 \*\* $p$ <0.001, \*\*\* $p$ <0.0001; \* $p$ <0.05 for vehicle-treated vs. Tat-Beclin1 treated rats using ANOVA followed  
358 by Tukey's post hoc test.

359 Volume assessments for the hippocampus and thalamus showed preservation of both  
360 structures with Tat-Beclin1 treatment. The hippocampus in Tat-Beclin1 treated rats retained  $80.09 \pm$   
361  $5.27\%$  of its size compared to the contralateral side, while the hippocampus in vehicle-treated rats  
362 was  $53.81 \pm 10.63\%$  of the contralateral side (Fig. 5 A-B). The difference in hippocampal size was  
363 statistically significant (\*\* $p$ <0.001) between Sham and vehicle-treated groups, but not statistically  
364 different between Sham and Tat-Beclin1 treated groups. The thalamus in Tat-Beclin1 treated rats  
365 retained  $91.88 \pm 3.08\%$  of its size compared to the contralateral side, while the thalamus in vehicle-  
366 treated rats was  $67.09 \pm 9.01\%$  of the contralateral side, but the difference was not statistically  
367 significant (Fig. 5 A-B,  $p = 0.15$ )

368 A Pearson correlation coefficient was computed to assess the relationship between thalamic  
369 volume and horizontal beam performance among treatment groups. There was a strong negative  
370 correlation apparent in Vehicle treated animals ( $r = -0.964$ ,  $p = 0.008$ ) with a similar trend in Tat-  
371 Beclin1 treated rats ( $r = -0.656$ ,  $p = 0.229$ ). There was no correlation in the Sham group ( $r = 0.359$ ,  $p =$   
372  $0.129$ ) (Fig. 5C,D).

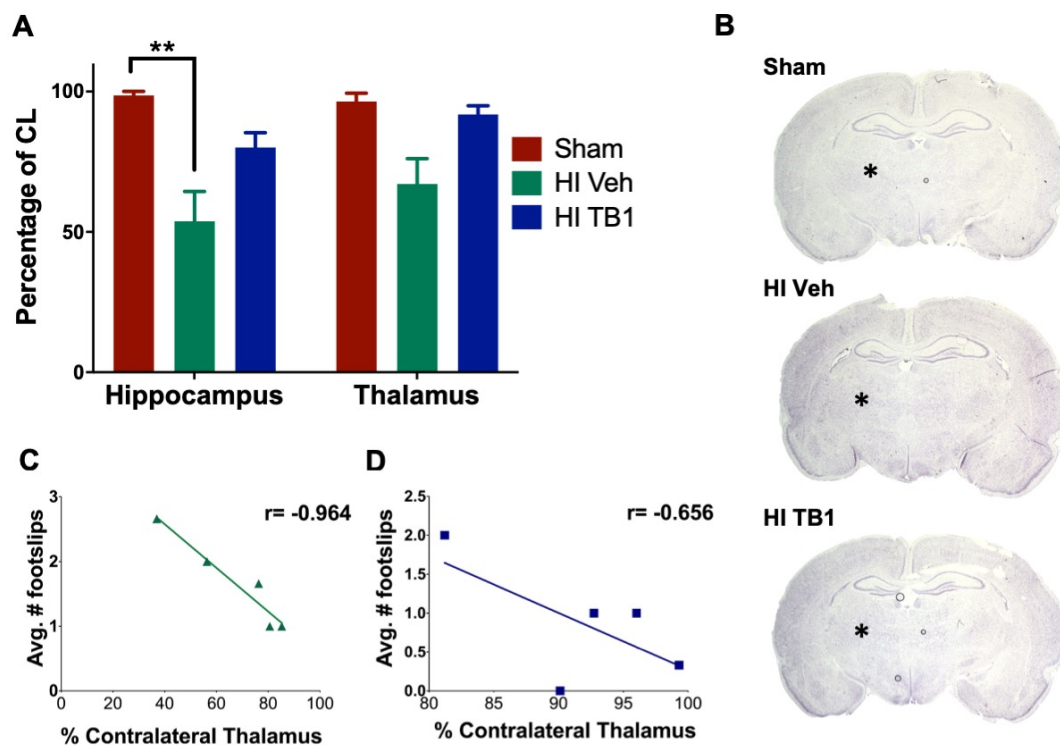

373

374 **Figure 5. Systemically administered Tat-Beclin1 reduces hippocampal and thalamic**  
375 **neurodegeneration after HI injury.** Cresyl Violet stained sections at +3 mm from Bregma were  
376 analyzed 2 weeks after HI injury at P6. (a) Areas of the hippocampus and thalamus were measured  
377 and normalized to contralateral structures. (b) Representative images of structural loss of  
378 hippocampal (enclosed by dashed line) and thalamic regions as compared to the contralateral  
379 hemisphere n=3 for Sham group; n=5 per HI groups. Data are presented as means  $\pm$  SEM, \*\* $p$ <0.001  
380 by ANOVA followed by Tukey's post hoc. (c,d) Pearson's correlation analysis for average number of  
381 footslips per run and the normalized volume of the thalamus for vehicle (c) and (d) Tat-Beclin1-  
382 treated rats.

## 383 4. Discussion

384 Infants suffering from neonatal encephalopathy due to HI injury develop long-term neurological  
385 morbidity. Survivors face major neurodevelopmental disabilities that translate into lifelong  
386 neurological deficits, ranging from mild learning difficulties to severely debilitating epilepsy,  
387 cerebral palsy and cognitive disorders. As supportive management of moderate to severe  
388 encephalopathy continues to improve, the need for effective therapeutics that produce long-standing  
389 effects increases. Hence, it is absolutely vital to understand the physiological changes arising in the  
390 brain and the mechanisms underlying long-term neurodegeneration that occurs with this injury.

391 Many studies on perinatal HI have sought to elucidate the mechanisms of cell death towards  
392 producing therapeutics to prevent acute neurodegeneration. The majority of studies have focused on  
393 the apoptotic cell deaths that occur within the first 6-72 hours—the interval of secondary cell death.  
394 These studies have shown that caspase inhibitors confer little neuroprotection when administered  
395 soon after the injury [11, 24]. Other studies have shown that neurons undergo apoptosis in caspase-  
396 3 deficient mice [25] and also undergo caspase-independent forms of cell death following HI [23, 26].  
397 Evidently, more novel strategies that interrupt HI induced cell death occurring in the secondary and  
398 tertiary stages of injury must be developed.

399 We have previously shown that neuroinflammation and subsequent brain damage can be  
400 attenuated with systemic SB505124 administration. However, the mechanisms responsible for the  
401 reduced progression of neuronal death with SB505124 treatment was unknown [14-16]. Our findings  
402 now indicate that SB505124 treatment sharply reduces apoptotic cell death in the neocortex one week  
403 following injury. When coupled with our prior volumetric studies, these data suggest that TGF $\beta$  type  
404 1 receptor inhibition reduces the number of dying cells to preserve brain volume.

### 405 4.1. Investigating autophagic flux *ex vivo*

406 Western blot of the injured tissue following one week of SB505124 administration showed  
407 significantly elevated LC3-I which could be due to increased synthesis of LC3-I or evidence of  
408 impaired autophagosome clearance [15]. Our slice culture data provided evidence that autophagic  
409 flux is increased when SB505124 is given 3 days after injury. Interestingly, previous studies have  
410 shown that autophagy is enhanced after HI but becomes progressively inhibited, coinciding with an  
411 increase in neuronal death [27]. Lechpammer et al., (2016) showed that downstream mTORC1  
412 targets such as p70/S6 kinase and 40S ribosomal protein S6 were activated following HI injury in P6  
413 rats and multiple studies have shown that increased mTOR activity inhibits autophagy [28]. An  
414 analysis of post-mortem human brain tissue from asphyxiated infants showed a 7-fold increase in  
415 LC3 puncta in dying neurons of the basal ganglia compared to non-injured controls, leading to the  
416 conclusion that autophagy flux and degradation of LC3 within the lysosome was greatly impaired  
417 prior to death [29]. As described for models of other neurodegenerative conditions that include  
418 Alzheimer, Parkinson and Huntington diseases, reversing impaired autophagic responses during the  
419 late stages of injury may indeed be beneficial [30-32].

420 SB505124 and chloroquine significantly increased accumulation of LC3-I and p62 in HI injured  
421 brains. As chloroquine inhibits lysosomal protein degradation these data indicate that SB505124 was  
422 increasing active flux rather than inhibiting autophagy. Were SB505124 inhibiting autophagic flux  
423 then there should have been no change in LC3-I:p62 levels in the presence of chloroquine. As further  
424 evidence, SB505124 treatment alone increased the LC3-II:LC3-I ratio, representing increased  
425 lipidation of LC3 and autophagic flux.

### 426 4.2. Inducing autophagy with *Tat-Beclin1*

427 Tat-Beclin1, which is a cell permeant protein that activates endogenous Beclin1 by competing  
428 against its negative regulator GAPR-1/GLIPR2 on the Golgi surface, was first identified as a potential  
429 therapeutic in 2013 [22]. The peptide has been shown to induce autophagy in rodents and is well  
430 tolerated when administered daily for up to two weeks [22]. In that study, Tat-Beclin1 was  
431 administered i.p. at 15 mg/kg per day to mice infected with the West Nile virus where it significantly  
432 reduced brain viral titers and mortality 6 days after the start of dosing [22]. Use of the peptide also  
433 has been shown to promote axonal regeneration following spinal cord injury in mice [33], reduce  
434 neurotoxicity due to hyperammonemia [34] and to improve long-term memory when directly  
435 injected into the hippocampus [35]. Interestingly, in an adult model of stroke using middle cerebral  
436 artery occlusion, a small dose of Tat-Beclin1 (1.5 mg/kg) given i.p. at 6 and 13 days after injury  
437 worsened the neurological deficit and increased infarct volumes [36]. Therefore, it was not clear *a priori*  
438 that administering Tat-Beclin1 in this neonatal model of HI injury would be beneficial.

439 We initiated Tat-beclin1 treatment on the same day that SB505124 treatment had begun in our  
440 previous studies to enable comparisons and based on earlier studies [22]. We used a dose of 15  
441 mg/kg, i.p. which is 10X the dose administered by Hongyun et al., 2017, and decided not to use a  
442 higher dosage to prevent over-stimulation which may drive cell death via autosis [23]. Curiously, a  
443 significant difference in mean body weight between Sham animals and vehicle-treated animals was  
444 seen starting at 2 weeks post-injury here and in a previous study [14]. As with SB505124 treatment,  
445 Tat-beclin1 increased the mean body weights of the HI rats. Furthermore, both hippocampal and  
446 thalamic integrity were preserved with Tat-Beclin1 treatment; these two structures also were  
447 significantly preserved in SB505124 treated animals [15]. Importantly, salvaging the thalamus  
448 correlated with the improvements in sensorimotor function.

449 Overall, our work has established that the neuroprotective effects of SB505124 administration  
450 can be attributed to enhanced autophagy that reduces the incidence of apoptotic cell death that occurs  
451 several days to weeks after the injury has occurred. Our novel findings have established the basis for  
452 future studies to validate SB505124 or drugs with similar mechanisms of action as therapeutics. Our  
453 studies also showed that inducing autophagic flux by administering Tat-Beclin1 during the tertiary  
454 phase of HI injury improved both histopathological and functional outcomes. Unlike other possible  
455 neuroprotectants, both SB505124 and Tat-Beclin1 can be delivered peripherally as they penetrate into  
456 the CNS. This mode of delivery makes these treatments highly translatable into the clinic and make  
457 our studies highly promising for the treatment of moderate HI in human infants.

458 **Supplementary Materials:** Figure S1: Systemic Tat-Beclin1 administration increases P62 and LC3 colocalization  
459 in neurons but not in astrocytes up to 48 h after injection.

460 **Author Contributions:** Conceptualization, SWL and RD; methodology, SWL and RD; formal analysis, BK, HDK,  
461 and MJ; writing—original draft preparation, BK, MJ, and SWL.; writing—review and editing, SWL, RD, and BK.;  
462 funding acquisition, SWL and RD. All authors have read and agreed to the published version of the manuscript

463 **Funding:** This research was funded by a grant from the Leducq foundation (10 CVD 010) awarded to SWL and  
464 by a grant from the International Alzheimer's Association #NIRG-305325 and the National Institutes of Health  
465 #R01AG062475 awarded to R.D.

466 **Conflicts of Interest:** The authors declare no conflict of interest.

467

468 Appendix A

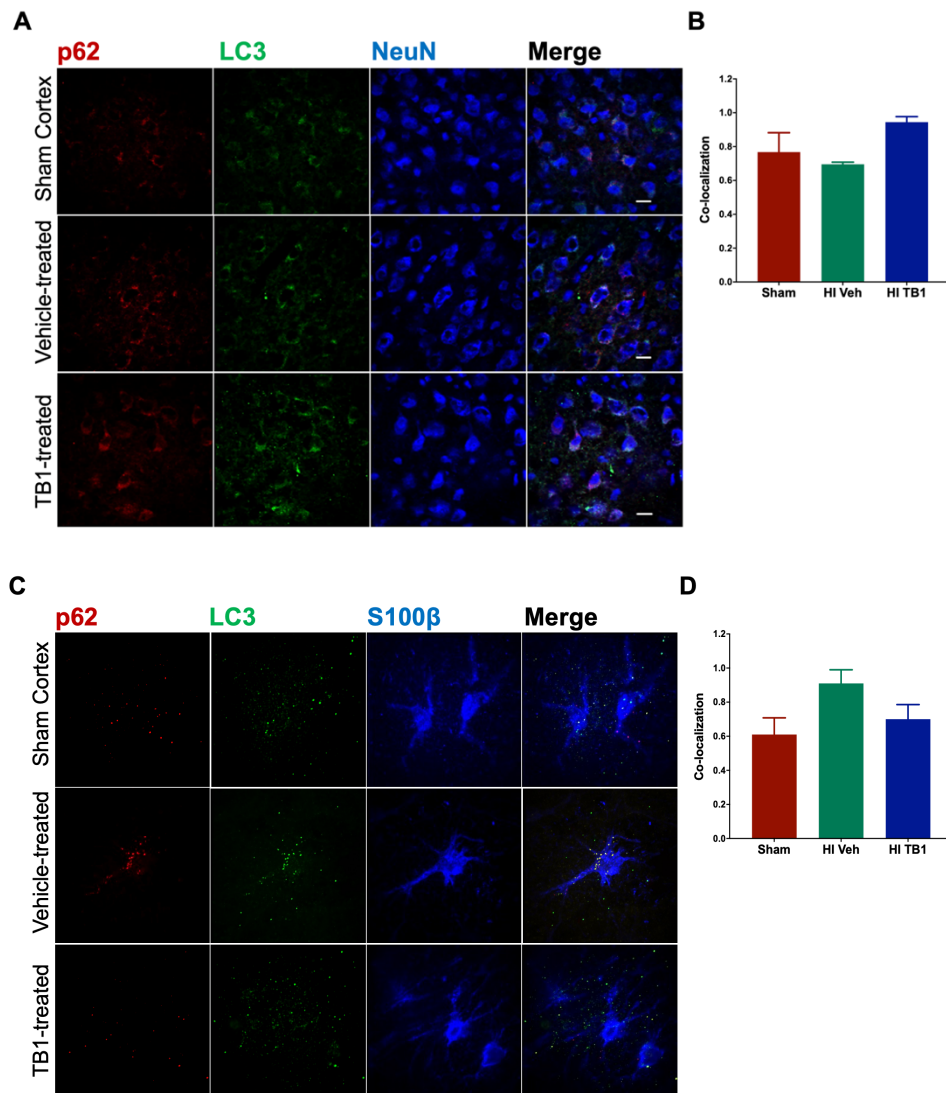

469

470 **Figure S1. Systemic Tat-Beclin1 administration increases P62 and LC3 colocalization in neurons**  
471 **but not in astrocytes up to 48 h after injection.** Three days after HI, rat pups were injected i.p. with  
472 Tat-Beclin1 (15mg/kg) or vehicle (PBS). 48 h after injection, samples of the injured forebrain were  
473 prepared for immunofluorescence analysis. (a) Representative cortical neurons in the ischemic  
474 penumbra of injury with Sham neocortex as control stained with anti-p62 (red), anti-LC3 (green), and  
475 anti-NeuN (blue) markers. (b) Manders' colocalization coefficient (M1) for the fractional overlap of  
476 p62 signal in compartments containing LC3 signal for the neocortex. (c) Representative astrocytes in  
477 the ischemic penumbra with Sham neocortex as control stained with anti-p62 (red), anti-LC3 (green),  
478 and anti-S100β (blue) markers. (d) M1 colocalization coefficient for the fractional overlap of p62 signal  
479 in compartments containing LC3 signal for the neocortex. Values represent averages ± SEM.  
480 n=3/group.

481

482 **References**

- 483 1. Lloyd-Jones, D., et al., *Heart disease and stroke statistics--2009 update: a report from the American Heart*  
484 *Association Statistics Committee and Stroke Statistics Subcommittee.* Circulation, 2009. **119**(3): p. 480-6.  
485 2. Ferriero, D.M., *Neonatal brain injury.* N Engl J Med, 2004. **351**(19): p. 1985-1995.

- 486 3. Graham, E.M., et al., *A systematic review of the role of intrapartum hypoxia-ischemia in the causation of*  
487 *neonatal encephalopathy*. Am J Obstet Gynecol, 2008. **199**(6): p. 587-95.
- 488 4. Fatemi, A., M.A. Wilson, and M.V. Johnston, *Hypoxic Ischemic Encephalopathy in the Term Infant*. Clin  
489 Perinatol, 2009. **36**(4): p. 835-vii.
- 490 5. Takeoka, M., et al., *Diffusion-weighted images in neonatal cerebral hypoxic-ischemic injury*. Pediatr Neurol,  
491 2002. **26**(4): p. 274-81.
- 492 6. Hagberg, H., et al., *The role of inflammation in perinatal brain injury*. Nat Rev Neurol, 2015. **11**(4): p. 192-  
493 208.
- 494 7. Qin, X., et al., *Mechanism and Treatment Related to Oxidative Stress in Neonatal Hypoxic-Ischemic*  
495 *Encephalopathy*. Frontiers in molecular neuroscience, 2019. **12**: p. 88-88.
- 496 8. Lai, M.C. and S.N. Yang, *Perinatal hypoxic-ischemic encephalopathy*. J Biomed Biotechnol, 2011. **2011**: p.  
497 609813.
- 498 9. Askalan, R., et al., *Mechanisms of neurodegeneration after severe hypoxic-ischemic injury in the neonatal rat*  
499 *brain*. Brain Res, 2015. **1629**: p. 94-103.
- 500 10. Kim, B.H. and S.W. Levison, *TGFβ1: Friend or Foe During Recovery in Encephalopathy*. The Neuroscientist,  
501 2019. **25**(3): p. 192-198.
- 502 11. Puyal, J., et al., *Postischemic treatment of neonatal cerebral ischemia should target autophagy*. Ann Neurol,  
503 2009. **66**(3): p. 378-89.
- 504 12. Wang, Q., et al., *Neonatal hypoxic-ischemic encephalopathy: emerging therapeutic strategies based on*  
505 *pathophysiologic phases of the injury*. The Journal of Maternal-Fetal & Neonatal Medicine, 2019. **32**(21): p.  
506 3685-3692.
- 507 13. Logan, A., et al., *Enhanced expression of transforming growth factor beta 1 in the rat brain after a localized*  
508 *cerebral injury*. Brain research, 1992. **587**(2): p. 216-225.
- 509 14. Guardia Clausi, M. and S.W. Levison, *Delayed ALK5 inhibition improves functional recovery in neonatal*  
510 *brain injury*. J Cereb Blood Flow Metab, 2016.
- 511 15. Kim, B.H., et al., *Age-Dependent Effects of ALK5 Inhibition and Mechanism of Neuroprotection in Neonatal*  
512 *Hypoxic-Ischemic Brain Injury*. Dev Neurosci, 2017. **39**(1-4): p. 338-351.
- 513 16. Bain, J.M., et al., *TGFβ1 stimulates the over-production of white matter astrocytes from precursors of the "brain*  
514 *marrow" in a rodent model of neonatal encephalopathy*. PLoS One, 2010. **5**(3): p. e9567.
- 515 17. Hamilton, N., *Quantification and its applications in fluorescent microscopy imaging*. Traffic, 2009. **10**(8): p.  
516 951-61.
- 517 18. Dunn, K.W., M.M. Kamocka, and J.H. McDonald, *A practical guide to evaluating colocalization in biological*  
518 *microscopy*. Am J Physiol Cell Physiol, 2011. **300**(4): p. C723-42.
- 519 19. Fehsel, K., et al., *In situ nick-translation detects focal apoptosis in thymuses of glucocorticoid- and*  
520 *lipopolysaccharide-treated mice*. J.Histochem.Cytochem., 1994. **42**: p. 613-619.
- 521 20. Tanida, I. and S. Waguri, *Measurement of Autophagy in Cells and Tissues*, in *Protein Misfolding and Cellular*  
522 *Stress in Disease and Aging: Concepts and Protocols*, P. Bross and N. Gregersen, Editors. 2010, Humana  
523 Press: Totowa, NJ. p. 193-214.
- 524 21. Nnah, I.C., et al., *TFEB-driven endocytosis coordinates MTORC1 signaling and autophagy*. Autophagy, 2019.  
525 **15**(1): p. 151-164.
- 526 22. Shoji-Kawata, S., et al., *Identification of a candidate therapeutic autophagy-inducing peptide*. Nature, 2013.  
527 **494**(7436): p. 201-6.



- 528 23. Liu, Y., et al., *Autosis is a Na<sup>+</sup>,K<sup>+</sup>-ATPase-regulated form of cell death triggered by autophagy-inducing*  
529 *peptides, starvation, and hypoxia-ischemia*. Proc Natl Acad Sci U S A, 2013. **110**(51): p. 20364-71.
- 530 24. Zhu, C., et al., *Apoptosis-inducing factor is a major contributor to neuronal loss induced by neonatal cerebral*  
531 *hypoxia-ischemia*. Cell Death Differ, 2007. **14**(4): p. 775-84.
- 532 25. Koike, M., et al., *Inhibition of Autophagy Prevents Hippocampal Pyramidal Neuron Death after Hypoxic-*  
533 *Ischemic Injury*. The American Journal of Pathology, 2008. **172**(2): p. 454-469.
- 534 26. Ginet, V., et al., *Involvement of autophagy in hypoxic-excitotoxic neuronal death*. Autophagy, 2014. **10**(5): p.  
535 846-60.
- 536 27. Cui, D., et al., *Impaired autophagosome clearance contributes to neuronal death in a piglet model of neonatal*  
537 *hypoxic-ischemic encephalopathy*. Cell Death Dis, 2017. **8**(7): p. e2919.
- 538 28. Lechpammer, M., et al., *Upregulation of cystathione beta-synthase and p70S6K/S6 in neonatal hypoxic*  
539 *ischemic brain injury*. Brain Pathol, 2016.
- 540 29. Xie, C., et al., *Neuroprotection by selective neuronal deletion of Atg7 in neonatal brain injury*. Autophagy,  
541 2016. **12**(2): p. 410-23.
- 542 30. Reddy, K., et al., *Dysregulation of Nutrient Sensing and CLEARance in Presenilin Deficiency*. Cell Rep, 2016.  
543 **14**(9): p. 2166-79.
- 544 31. Croce, K.R. and A. Yamamoto, *A role for autophagy in Huntington's disease*. Neurobiol Dis, 2019. **122**: p.  
545 16-22.
- 546 32. Karabiyik, C., M.J. Lee, and D.C. Rubinsztein, *Autophagy impairment in Parkinson's disease*. Essays  
547 Biochem, 2017. **61**(6): p. 711-720.
- 548 33. He, M., et al., *Autophagy induction stabilizes microtubules and promotes axon regeneration after spinal cord*  
549 *injury*. Proc Natl Acad Sci U S A, 2016. **113**(40): p. 11324-11329.
- 550 34. Soria, L.R. and N. Brunetti-Pierri, *Targeting autophagy for therapy of hyperammonemia*. Autophagy, 2018.  
551 **14**(7): p. 1273-1275.
- 552 35. Hylin, M.J., et al., *A role for autophagy in long-term spatial memory formation in male rodents*. J Neurosci Res,  
553 2018. **96**(3): p. 416-426.
- 554 36. Hongyun, H., et al., *Puerarin provides a neuroprotection against transient cerebral ischemia by attenuating*  
555 *autophagy at the ischemic penumbra in neurons but not in astrocytes*. Neurosci Lett, 2017. **643**: p. 45-51.

556 **Publisher's Note:** MDPI stays neutral with regard to jurisdictional claims in published maps and institutional  
557 affiliations.

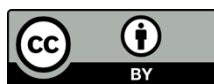

© 2020 by the authors. Submitted for possible open access publication under the terms and conditions of the Creative Commons Attribution (CC BY) license (<http://creativecommons.org/licenses/by/4.0/>).
